# Supplementary material for: High Production of LukMF’ in Staphylococcus aureus Field Strains Is Associated with Clinical Bovine Mastitis
Source: PubMed Central journal article supplement (PMC5983256; doi:10.3390/toxins10050200), 2018-05-15
Supplement: toxins-10-00200-s001.pdf [file toxins-10-00200-s001.pdf]

# Supplementary Materials: High Production of LukMF' in Staphylococcus aureus Field Strains Is Associated with Clinical Bovine Mastitis

Jurriaan Hoekstra, Victor Rutten, Laura Sommeling, Tine van Werven, Mirlin Spaninks, Birgitta Duim, Lindert Benedictus, Gerrit Koop

CC133-s139 1 ATGTTTAAAGAGAAAATTATTAGTTACAACCTTTGTCGCTAGGCTAATTGTCCTATAGCTACACCATTTCAGGCTCTAAGGCTACTACT  
 CC151-s31 1 ATGTTTAAAGAGAAAATTATTAGTTACAACCTTTGTCGCTAGGCTAATTGTCCTATAGCTACACCATTTCAGGCTCTAAGGCTACTACT  
 CC151-s483 1 ATGTTTAAAGAGAAAATTATTAGTTACAACCTTTGTCGCTAGGCTAATTGTCCTATAGCTACACCATTTCAGGCTCTAAGGCTACTACT  
 CC151-s909 1 ATGTTTAAAGAGAAAATTATTAGTTACAACCTTTGTCGCTAGGCTAATTGTCCTATAGCTACACCATTTCAGGCTCTAAGGCTACTACT  
 CC479-s15 1 ATGTTTAAAGAGAAAATTATTAGTTACAACCTTTGTCGCTAGGCTAATTGTCCTATAGCTACACCATTTCAGGCTCTAAGGCTACTACT  
 CC479-s28 1 ATGTTTAAAGAGAAAATTATTAGTTACAACCTTTGTCGCTAGGCTAATTGTCCTATAGCTACACCATTTCAGGCTCTAAGGCTACTACT  
 CC479-s58 1 ATGTTTAAAGAGAAAATTATTAGTTACAACCTTTGTCGCTAGGCTAATTGTCCTATAGCTACACCATTTCAGGCTCTAAGGCTACTACT

CC133-s139 91 AATGCAGAAGATATTGGCGACGATGCAGAAGTGATTAACGTCACGGAAGATGTAAGTAGTAGGAAATGGGGTGTAAACAAAAATGTCCAA  
 CC151-s31 91 AATGCAGAAGATATTGGCGACGATGCAGAAGTGATTAACGTCACGGAAGATGTAAGTAGTAGGAAATGGGGTGTAAACAAAAATGTCCAA  
 CC151-s483 91 AATGCAGAAGATATTGGCGACGATGCAGAAGTGATTAACGTCACGGAAGATGTAAGTAGTAGGAAATGGGGTGTAAACAAAAATGTCCAA  
 CC151-s909 91 AATGCAGAAGATATTGGCGACGATGCAGAAGTGATTAACGTCACGGAAGATGTAAGTAGTAGGAAATGGGGTGTAAACAAAAATGTCCAA  
 CC479-s15 91 AATGCAGAAGATATTGGTCACGATGCAGAAGTGATTAACGTCACGGAAGATGTAAGTAGTAGGAAATGGGGTGTAAACAAAAATGTCCAA  
 CC479-s28 91 AATGCAGAAGATATTGGTCACGATGCAGAAGTGATTAACGTCACGGAAGATGTAAGTAGTAGGAAATGGGGTGTAAACAAAAATGTCCAA  
 CC479-s58 91 AATGCAGAAGATATTGGTCACGATGCAGAAGTGATTAACGTCACGGAAGATGTAAGTAGTAGGAAATGGGGTGTAAACAAAAATGTCCAA

CC133-s139 181 TTTGATTTTCGTA AAAAGATAAAAAATATAACAAAGACGCATTAATTATTAAGATGCAAGGTTTTATCAATTCAGGACAACCTTCAATGAT  
 CC151-s31 181 TTTGATTTTCGTA AAAAGATAAAAAATATAACAAAGACGCATTAATTATTAAGATGCAAGGTTTTATCAATTCAGGACAACCTTCAATGAT  
 CC151-s483 181 TTTGATTTTCGTA AAAAGATAAAAAATATAACAAAGACGCATTAATTATTAAGATGCAAGGTTTTATCAATTCAGGACAACCTTCAATGAT  
 CC151-s909 181 TTTGATTTTCGTA AAAAGATAAAAAATATAACAAAGACGCATTAATTATTAAGATGCAAGGTTTTATCAATTCAGGACAACCTTCAATGAT  
 CC479-s15 181 TTTGATTTTCGTA AAAAGATAAAAAATATAACAAAGACGCATTAATTATTAAGATGCAAGGTTTTATCAATTCAGGACAACCTTCAATGAT  
 CC479-s28 181 TTTGATTTTCGTA AAAAGATAAAAAATATAACAAAGACGCATTAATTATTAAGATGCAAGGTTTTATCAATTCAGGACAACCTTCAATGAT  
 CC479-s58 181 TTTGATTTTCGTA AAAAGATAAAAAATATAACAAAGACGCATTAATTATTAAGATGCAAGGTTTTATCAATTCAGGACAACCTTCAATGAT

CC133-s139 271 GTTAAACAAAAATAGAGCAAATAAAAAGAAATGGTTGGCCATTTCAATATAATATCGGTCTTACATCAAAGACGAAAAATACGAGCTTAATC  
 CC151-s31 271 GTTAAACAAAAATAGAGCAAATAAAAAGAAATGGTTGGCCATTTCAATATAATATCGGTCTTACATCAAAGACGAAAAATACGAGCTTAATC  
 CC151-s483 271 GTTAAACAAAAATAGAGCAAATAAAAAGAAATGGTTGGCCATTTCAATATAATATCGGTCTTACATCAAAGACGAAAAATACGAGCTTAATC  
 CC151-s909 271 GTTAAACAAAAATAGAGCAAATAAAAAGAAATGGTTGGCCATTTCAATATAATATCGGTCTTACATCAAAGACGAAAAATACGAGCTTAATC  
 CC479-s15 271 GTTAAACAAAAATAGAGCAAATAAAAAGAAATGGTTGGCCATTTCAATATAATATCGGTCTTACATCAAAGACGAAAAATACGAGCTTAATC  
 CC479-s28 271 GTTAAACAAAAATAGAGCAAATAAAAAGAAATGGTTGGCCATTTCAATATAATATCGGTCTTACATCAAAGACGAAAAATACGAGCTTAATC  
 CC479-s58 271 GTTAAACAAAAATAGAGCAAATAAAAAGAAATGGTTGGCCATTTCAATATAATATCGGTCTTACATCAAAGACGAAAAATACGAGCTTAATC

CC133-s139 361 AATTATCTTCCATAAAAATAAAAATAGAAAACAGTTCGATGTTGGTCAAACCTTTAGGATATAACATTGGAGTAAATCCAGTCAGTACCATCT  
 CC151-s31 361 AATTATCTTCCATAAAAATAAAAATAGAAAACAGTTCGATGTTGGTCAAACCTTTAGGATATAACATTGGAGTAAATCCAGTCAGCACCATCT  
 CC151-s483 361 AATTATCTTCCATAAAAATAAAAATAGAAAACAGTTCGATGTTGGTCAAACCTTTAGGATATAACATTGGAGTAAATCCAGTCAGCACCATCT  
 CC151-s909 361 AATTATCTTCCATAAAAATAAAAATAGAAAACAGTTCGATGTTGGTCAAACCTTTAGGATATAACATTGGAGTAAATCCAGTCAGCACCATCT  
 CC479-s15 361 AATTATCTTCCATAAAAATAAAAATAGAAAACAGTTCGATGTTGGTCAAACCTTTAGGATATAACATTGGAGTAAATCCAGTCAGCACCATCT  
 CC479-s28 361 AATTATCTTCCATAAAAATAAAAATAGAAAACAGTTCGATGTTGGTCAAACCTTTAGGATATAACATTGGAGTAAATCCAGTCAGCACCATCT  
 CC479-s58 361 AATTATCTTCCATAAAAATAAAAATAGAAAACAGTTCGATGTTGGTCAAACCTTTAGGATATAACATTGGAGTAAATCCAGTCAGCACCATCT

CC133-s139 451 ATAGGCGGAAATGGATCATTTAATTATTCTAAGAGTATTAATAATTTCCAAAAGAGTTATGTCAGCGAAGTTGAACAACAAGCTCAAAA  
 CC151-s31 451 ATAGGCGGAAATGGATCATTTAATTATTCTAAGAGTATTAATAATTTCCAAAAGAGTTATGTCAGCGAAGTTGAACAACAAGCTCAAAA  
 CC151-s483 451 ATAGGCGGAAATGGATCATTTAATTATTCTAAGAGTATTAATAATTTCCAAAAGAGTTATGTCAGCGAAGTTGAACAACAAGCTCAAAA  
 CC151-s909 451 ATAGGCGGAAATGGATCATTTAATTATTCTAAGAGTATTAATAATTTCCAAAAGAGTTATGTCAGCGAAGTTGAACAACAAGCTCAAAA  
 CC479-s15 451 ATAGGCGGAAATGGATCATTTAATTATTCTAAGAGTATTAATAATTTCCAAAAGAGTTATGTCAGCGAAGTTGAACAACAAGCTCAAAA  
 CC479-s28 451 ATAGGCGGAAATGGATCATTTAATTATTCTAAGAGTATTAATAATTTCCAAAAGAGTTATGTCAGCGAAGTTGAACAACAAGCTCAAAA  
 CC479-s58 451 ATAGGCGGAAATGGATCATTTAATTATTCTAAGAGTATTAATAATTTCCAAAAGAGTTATGTCAGCGAAGTTGAACAACAAGCTCAAAA

CC133-s139 541 ACTATTAAGTGGGGGGTTAAAGCAAATCTTTTGTATAGCAGGGCATCGATGGTCTGCTTACGATGAATTATTGTTTATAAGAAATACG  
 CC151-s31 541 ACTATTAAGTGGGGGGTTAAAGCAAATCTTTTGTATAGCAGGGCATCGATGGTCTGCTTACGATGAATTATTGTTTATAAGAAATACG  
 CC151-s483 541 ACTATTAAGTGGGGGGTTAAAGCAAATCTTTTGTATAGCAGGGCATCGATGGTCTGCTTACGATGAATTATTGTTTATAAGAAATACG  
 CC151-s909 541 ACTATTAAGTGGGGGGTTAAAGCAAATCTTTTGTATAGCAGGGCATCGATGGTCTGCTTACGATGAATTATTGTTTATAAGAAATACG  
 CC479-s15 541 ACTATTAAGTGGGGGGTTAAGCAAATCTTTTGTATAGCAGGGCATCGATGGTCTGCTTACGATGAATTATTGTTTATAAGAAATACG  
 CC479-s28 541 ACTATTAAGTGGGGGGTTAAGCAAATCTTTTGTATAGCAGGGCATCGATGGTCTGCTTACGATGAATTATTGTTTATAAGAAATACG  
 CC479-s58 541 ACTATTAAGTGGGGGGTTAAGCAAATCTTTTGTATAGCAGGGCATCGATGGTCTGCTTACGATGAATTATTGTTTATAAGAAATACG

CC133-s139 631 ACAAGAGGACCTAATGCTAGAGACTATTTTGTAGACGATAAATGAATTGCCCCCTTTAATAACAAGTGGATTAAATCCGCTCTTTTATCGCG  
 CC151-s31 631 ACAAGAGGACCTAATGCTAGAGACTATTTTGTAGACGATAAATGAATTGCCCCCTTTAATAACAAGTGGATTAAATCCGCTCTTTTATCGCG  
 CC151-s483 631 ACAAGAGGACCTAATGCTAGAGACTATTTTGTAGACGATAAATGAATTGCCCCCTTTAATAACAAGTGGATTAAATCCGCTCTTTTATCGCG  
 CC151-s909 631 ACAAGAGGACCTAATGCTAGAGACTATTTTGTAGACGATAAATGAATTGCCCCCTTTAATAACAAGTGGATTAAATCCGCTCTTTTATCGCG  
 CC479-s15 631 ACAAGAGGACCTAATGCTAGAGACTATTTTGTAGACGATAAATGAATTGCCCCCTTTAATAACAAGTGGATTAAATCCGCTCTTTTATCGCG  
 CC479-s28 631 ACAAGAGGACCTAATGCTAGAGACTATTTTGTAGACGATAAATGAATTGCCCCCTTTAATAACAAGTGGATTAAATCCGCTCTTTTATCGCG

CC479-s58 631 ACAAGAGGACCTAATGCTAGAGACTATTTGTAGACGATAATGAATTGCCCCCTTTAATAACAAGTGGATTTAATCCGCTTTTATCGCC

CC133-s139 721 ACAGTATCTCACGAAAAAGATTTCAGGCGATACGAGCGAATTTGAAATTACTTACGGTAGAAAATATGGATGTTACCTATGCAACCTACCTT  
 CC151-s31 721 ACAGTATCTCACGAAAAAGATTTCAGGCGATACGAGCGAATTTGAAATTACTTACGGTAGAAAATATGGATGTTACCTATGCAACCTACCTT  
 CC151-s483 721 ACAGTATCTCACGAAAAAGATTTCAGGCGATACGAGCGAATTTGAAATTACTTACGGTAGAAAATATGGATGTTACCTATGCAACCTACCTT  
 CC151-s909 721 ACAGTATCTCACGAAAAAGATTTCAGGCGATACGAGCGAATTTGAAATTACTTACGGTAGAAAATATGGATGTTACCTATGCAACCTACCTT  
 CC479-s15 721 ACAGTATCTCACGAAAAAGATTTCAGGCGATACGAGCGAATTTGAAATTACTTACGGTAGAAAATATGGATGTTACCTATGCAACCTACCTT  
 CC479-s28 721 ACAGTATCTCACGAAAAAGATTTCAGGCGATACGAGCGAATTTGAAATTACTTACGGTAGAAAATATGGATGTTACCTATGCAACCTACCTT  
 CC479-s58 721 ACAGTATCTCACGAAAAAGATTTCAGGCGATACGAGCGAATTTGAAATTACTTACGGTAGAAAATATGGATGTTACCTATGCAACCTACCTT

CC133-s139 811 CCTAAACTTGGTCTTTATCCAGAAAGAAAAACATAATGAATTTGTAACAGAAACTTTGTGGTCAAAATATGAAGTGAATGGAAAACGTAC  
 CC151-s31 811 CCTAAACTTGGTCTTTATCCAGAAAGAAAAACATAATGAATTTGTAACAGAAACTTTGTGGTCAAAATATGAAGTGAATGGAAAACGTAC  
 CC151-s483 811 CCTAAACTTGGTCTTTATCCAGAAAGAAAAACATAATGAATTTGTAACAGAAACTTTGTGGTCAAAATATGAAGTGAATGGAAAACGTAC  
 CC151-s909 811 CCTAAACTTGGTCTTTATCCAGAAAGAAAAACATAATGAATTTGTAACAGAAACTTTGTGGTCAAAATATGAAGTGAATGGAAAACGTAC  
 CC479-s15 811 CCTAAACTTGGTCTTTATCCAGAAAGAAAAACATAATGAATTTGTAACAGAAACTTTGTGGTCAAAATATGAAGTGAATGGAAAACGTAC  
 CC479-s28 811 CCTAAACTTGGTCTTTATCCAGAAAGAAAAACATAATGAATTTGTAACAGAAACTTTGTGGTCAAAATATGAAGTGAATGGAAAACGTAC  
 CC479-s58 811 CCTAAACTTGGTCTTTATCCAGAAAGAAAAACATAATGAATTTGTAACAGAAACTTTGTGGTCAAAATATGAAGTGAATGGAAAACGTAC

CC133-s139 901 GAAATTAAGTAAAGGGGCACAACATA  
 CC151-s31 901 GAAATTAAGTAAAGGGGCACAACATA  
 CC151-s483 901 GAAATTAAGTAAAGGGGCACAACATA  
 CC151-s909 901 GAAATTAAGTAAAGGGGCACAACATA  
 CC479-s15 901 GAAATTAAGTAAAGGGGCACAACATA  
 CC479-s28 901 GAAATTAAGTAAAGGGGCACAACATA  
 CC479-s58 901 GAAATTAAGTAAAGGGGCACAACATA

**Figure S1 (a).** Alignment of *lukM* of seven *S. aureus* isolates obtained from cases of bovine mastitis. Sequences obtained from whole genome sequence (WGS) from seven isolates using reference *lukM* sequence (GenBank accession: 1262967). Isolates were selected based on CC and LukMF' production potential (high LukMF' production = CC479, low LukMF' production = CC151, CC133). Black area indicates consensus region of genes.

CC133-s139 1 ATGAAATTTAAGAATATAGTCAAATCATCAGTCGCTACATCAATTAATCATATGCTATCAAATACAGTTGATGCGAGCTCAACATATC  
 CC151-s31 1 ATGAAATTTAAGAATATAGTCAAATCATCAGTCGCTACATCAATTAATCATATGCTATCAAATACAGTTGATGCGAGCTCAACATATC  
 CC151-s483 1 ATGAAATTTAAGAATATAGTCAAATCATCAGTCGCTACATCAATTAATCATATGCTATCAAATACAGTTGATGCGAGCTCAACATATC  
 CC151-s909 1 ATGAAATTTAAGAATATAGTCAAATCATCAGTCGCTACATCAATTAATCATATGCTATCAAATACAGTTGATGCGAGCTCAACATATC  
 CC479-s15 1 ATGAAATTTAAGAATATAGTCAAATCATCAGTCGCTACATCAATTAATCATATGCTATCAAATACAGTTGATGCGAGCTCAACATATC  
 CC479-s28 1 ATGAAATTTAAGAATATAGTCAAATCATCAGTCGCTACATCAATTAATCATATGCTATCAAATACAGTTGATGCGAGCTCAACATATC  
 CC479-s58 1 ATGAAATTTAAGAATATAGTCAAATCATCAGTCGCTACATCAATTAATCATATGCTATCAAATACAGTTGATGCGAGCTCAACATATC

CC133-s139 91 ACACCTGTCAGCGAGAAAAAGTGGATGACAAAATCACTTGTACAAAACGACTGCTACATCAGATTCTGACAAATAAAAATTTCTCAA  
 CC151-s31 91 ACACCTGTCAGCGAGAAAAAGTGGATGACAAAATCACTTGTACAAAACGACTGCTACATCAGATTCTGACAAATAAAAATTTCTCAA  
 CC151-s483 91 ACACCTGTCAGCGAGAAAAAGTGGATGACAAAATCACTTGTACAAAACGACTGCTACATCAGATTCTGACAAATAAAAATTTCTCAA  
 CC151-s909 91 ACACCTGTCAGCGAGAAAAAGTGGATGACAAAATCACTTGTACAAAACGACTGCTACATCAGATTCTGACAAATAAAAATTTCTCAA  
 CC479-s15 91 ACACCTGTCAGCGAGAAAAAGTGGATGACAAAATCACTTGTACAAAACGACTGCTACATCAGATTCTGACAAATAAAAATTTCTCAA  
 CC479-s28 91 ACACCTGTCAGCGAGAAAAAGTGGATGACAAAATCACTTGTACAAAACGACTGCTACATCAGATTCTGACAAATAAAAATTTCTCAA  
 CC479-s58 91 ACACCTGTCAGCGAGAAAAAGTGGATGACAAAATCACTTGTACAAAACGACTGCTACATCAGATTCTGACAAATAAAAATTTCTCAA

CC133-s139 181 ATTCTAACTTTTAAATTTTATTAAGACAAAAGTTATGATAAAGACACATTAATACTAAAAGCTGCCGAAAACATTTACTCAGGCTATACC  
 CC151-s31 181 ATTCTAACTTTTAAATTTTATTAAGACAAAAGTTATGATAAAGACACATTAATACTAAAAGCTGCCGAAAACATTTACTCAGGCTATACC  
 CC151-s483 181 ATTCTAACTTTTAAATTTTATTAAGACAAAAGTTATGATAAAGACACATTAATACTAAAAGCTGCCGAAAACATTTACTCAGGCTATACC  
 CC151-s909 181 ATTCTAACTTTTAAATTTTATTAAGACAAAAGTTATGATAAAGACACATTAATACTAAAAGCTGCCGAAAACATTTACTCAGGCTATACC  
 CC479-s15 181 ATTCTAACTTTTAAATTTTATTAAGACAAAAGTTATGATAAAGACACATTAATACTAAAAGCTGCCGAAAACATTTACTCAGGCTATACC  
 CC479-s28 181 ATTCTAACTTTTAAATTTTATTAAGACAAAAGTTATGATAAAGACACATTAATACTAAAAGCTGCCGAAAACATTTACTCAGGCTATACC  
 CC479-s58 181 ATTCTAACTTTTAAATTTTATTAAGACAAAAGTTATGATAAAGACACATTAATACTAAAAGCTGCCGAAAACATTTACTCAGGCTATACC

CC133-s139 271 CAACCCACTTCTGATAGTAGTATAAATTCACAATTTTATTGGGGAGCTAAGTATAATGTTTTGTTAGCTCGGAGTCCAAAGATTTCTGTA  
 CC151-s31 271 CAACCCACTTCTGATAGTAGTATAAATTCACAATTTTATTGGGGAGCTAAGTATAATGTTTTGTTAGCTCGGAGTCCAAAGATTTCTGTA  
 CC151-s483 271 CAACCCACTTCTGATAGTAGTATAAATTCACAATTTTATTGGGGAGCTAAGTATAATGTTTTGTTAGCTCGGAGTCCAAAGATTTCTGTA  
 CC151-s909 271 CAACCCACTTCTGATAGTAGTATAAATTCACAATTTTATTGGGGAGCTAAGTATAATGTTTTGTTAGCTCGGAGTCCAAAGATTTCTGTA  
 CC479-s15 271 CAACCCACTTCTGATAGTAGTATAAATTCACAATTTTATTGGGGAGCTAAGTATAATGTTTTGTTAGCTCGGAGTCCAAAGATTTCTGTA  
 CC479-s28 271 CAACCCACTTCTGATAGTAGTATAAATTCACAATTTTATTGGGGAGCTAAGTATAATGTTTTGTTAGCTCGGAGTCCAAAGATTTCTGTA  
 CC479-s58 271 CAACCCACTTCTGATAGTAGTATAAATTCACAATTTTATTGGGGAGCTAAGTATAATGTTTTGTTAGCTCGGAGTCCAAAGATTTCTGTA

CC133-s139 361 AATATTGTTGACTACCGCCCTAAAAATCAAAATGAAGAATTTCAAGTTCAACAAACATTAGGTTATTATATGCGGAGATATTAATATA  
 CC151-s31 361 AATATTGTTGACTACCGCCCTAAAAATCAAAATGAAGAATTTCAAGTTCAACAAACATTAGGTTATTATATGCGGAGATATTAATATA  
 CC151-s483 361 AATATTGTTGACTACCGCCCTAAAAATCAAAATGAAGAATTTCAAGTTCAACAAACATTAGGTTATTATATGCGGAGATATTAATATA  
 CC151-s909 361 AATATTGTTGACTACCGCCCTAAAAATCAAAATGAAGAATTTCAAGTTCAACAAACATTAGGTTATTATATGCGGAGATATTAATATA  
 CC479-s15 361 AATATTGTTGACTACCGCCCTAAAAATCAAAATGAAGAATTTCAAGTTCAACAAACATTAGGTTATTATATGCGGAGATATTAATATA  
 CC479-s28 361 AATATTGTTGACTACCGCCCTAAAAATCAAAATGAAGAATTTCAAGTTCAACAAACATTAGGTTATTATATGCGGAGATATTAATATA  
 CC479-s58 361 AATATTGTTGACTACCGCCCTAAAAATCAAAATGAAGAATTTCAAGTTCAACAAACATTAGGTTATTATATGCGGAGATATTAATATA

CC133-s139 451 ATAATGGATTAAGTGGGATTTGAAATGGGTCAAAATCATTTTCAGAAACGATTAATTAAGCAAGAAAGCTACAGAATACGATTGAT  
 CC151-s31 451 ATAATGGATTAAGTGGGATTTGAAATGGGTCAAAATCATTTTCAGAAACGATTAATTAAGCAAGAAAGCTACAGAATACGATTGAT

```

CC151-s483 451 ATAAATGGATTAACCTGGTGGATTGAAACGGGTCAAATCATTTCAGAAACGATTAATTAAGCAAGAAAGCTACAGAACTACGATTGAT
CC151-s909 451 ATAAATGGATTAACCTGGTGGATTGAAACGGGTCAAATCATTTCAGAAACGATTAATTAAGCAAGAAAGCTACAGAACTACGATTGAT
CC479-s15 451 ATAAATGGATTAACCTGGTGGATTGAAATGGGTCAAATCATTTCAGAAACGATTAATTAAGCAAGAAAGCTACAGAACTACGATTGAT
CC479-s28 451 ATAAATGGATTAACCTGGTGGATTGAAATGGGTCAAATCATTTCAGAAACGATTAATTAAGCAAGAAAGCTACAGAACTACGATTGAT
CC479-s58 451 ATAAATGGATTAACCTGGTGGATTGAAATGGGTCAAATCATTTCAGAAACGATTAATTAAGCAAGAAAGCTACAGAACTACGATTGAT

CC133-s139 541 AGGAAAACAAATCATAAATCAATCGGCTGGGTGTGCGAGGCACATAAAATCATGAATAATGGTTGGGGCCCATATGGCAGAGATAGTAGT
CC151-s31 541 AGGAAAATAAATCAAAATTAATCGGCTGGGTGTGCGAGGCACATAAAATCATGAATAATGGTTGGGGACCATATGGCAGAGATAGTAGT
CC151-s483 541 AGGAAAATAAATCAAAATTAATCGGCTGGGTGTGCGAGGCACATAAAATCATGAATAATGGTTGGGGACCATATGGCAGAGATAGTAGT
CC151-s909 541 AGGAAAATAAATCAAAATTAATCGGCTGGGTGTGCGAGGCACATAAAATCATGAATAATGGTTGGGGACCATATGGCAGAGATAGTAGT
CC479-s15 541 AGGAAAACAAATCATAAATCAATCGGCTGGGTGTGCGAGGCACATAAAATCATGAATAATGGTTGGGGACCATATGGCAGAGATAGTAGT
CC479-s28 541 AGGAAAACAAATCATAAATCAATCGGCTGGGTGTGCGAGGCACATAAAATCATGAATAATGGTTGGGGACCATATGGCAGAGATAGTAGT
CC479-s58 541 AGGAAAACAAATCATAAATCAATCGGCTGGGTGTGCGAGGCACATAAAATCATGAATAATGGTTGGGGACCATATGGCAGAGATAGTAGT

CC133-s139 631 GATTCATTATATGGAAACGAACTATTTTTAGGTGGCAGACAGAGTAGCTCGAATGCTAATCAAATTTCTTACCAACACATCAAATGCC
CC151-s31 631 GATTCATTATATGGAAACGAACTATTTTTAGGTGGCAGACAGAGTAGCTCGAATGCTAATCAAATTTCTTACCAACACATCAAATGCC
CC151-s483 631 GATTCATTATATGGAAACGAACTATTTTTAGGTGGCAGACAGAGTAGCTCGAATGCTAATCAAATTTCTTACCAACACATCAAATGCC
CC151-s909 631 GATTCATTATATGGAAACGAACTATTTTTAGGTGGCAGACAGAGTAGCTCGAATGCTAATCAAATTTCTTACCAACACATCAAATGCC
CC479-s15 631 GATTCATTATATGGAAACGAACTATTTTTAGGTGGCAGACAGAGTAGCTCGAATGCTAATCAAATTTCTTACCAACACATCAAATGCC
CC479-s28 631 GATTCATTATATGGAAACGAACTATTTTTAGGTGGCAGACAGAGTAGCTCGAATGCTAATCAAATTTCTTACCAACACATCAAATGCC
CC479-s58 631 GATTCATTATATGGAAACGAACTATTTTTAGGTGGCAGACAGAGTAGCTCGAATGCTAATCAAATTTCTTACCAACACATCAAATGCC

CC133-s139 721 ATATTAGCAGCTGGTAATTC AATCCAGAATTTATAAGCGTACTTTCTCACAACAAAAGGATGTTAAAAATCTAAAAATTAAGTGACT
CC151-s31 721 ATATTAGCAGCTGGTAATTC AATCCAGAATTTATAAGCGTACTTTCTCACAACAAAAGGATGTTAAAAATCTAAAAATTAAGTGACT
CC151-s483 721 ATATTAGCAGCTGGTAATTC AATCCAGAATTTATAAGCGTACTTTCTCACAACAAAAGGATGTTAAAAATCTAAAAATTAAGTGACT
CC151-s909 721 ATATTAGCAGCTGGTAATTC AATCCAGAATTTATAAGCGTACTTTCTCACAACAAAAGGATGTTAAAAATCTAAAAATTAAGTGACT
CC479-s15 721 ATATTAGCAGCTGGTAATTC AATCCAGAATTTATAAGCGTACTTTCTCACAACAAAAGGATGTTAAAAATCTAAAAATTAAGTGACT
CC479-s28 721 ATATTAGCAGCTGGTAATTC AATCCAGAATTTATAAGCGTACTTTCTCACAACAAAAGGATGTTAAAAATCTAAAAATTAAGTGACT
CC479-s58 721 ATATTAGCAGCTGGTAATTC AATCCAGAATTTATAAGCGTACTTTCTCACAACAAAAGGATGTTAAAAATCTAAAAATTAAGTGACT

CC133-s139 811 TATCAAAGAGAAATGGATCGGTATGAAAATTTTGGAAACAACCTGCACCTGGATAGGTTATAATATTAAGAATCAAAGAGAGCAACACAC
CC151-s31 811 TATCAAAGAGAAATGGATCGGTATGAAAATTTTGGAAACAACCTGCACCTGGATAGGTTATAATATTAAGAATCAAAGAGAGCAACACAC
CC151-s483 811 TATCAAAGAGAAATGGATCGGTATGAAAATTTTGGAAACAACCTGCACCTGGATAGGTTATAATATTAAGAATCAAAGAGAGCAACACAC
CC151-s909 811 TATCAAAGAGAAATGGATCGGTATGAAAATTTTGGAAACAACCTGCACCTGGATAGGTTATAATATTAAGAATCAAAGAGAGCAACACAC
CC479-s15 811 TATCAAAGAGAAATGGATCGGTATGAAAATTTTGGAAACAACCTGCACCTGGATAGGTTATAATATTAAGAATCAAAGAGAGCAACACAC
CC479-s28 811 TATCAAAGAGAAATGGATCGGTATGAAAATTTTGGAAACAACCTGCACCTGGATAGGTTATAATATTAAGAATCAAAGAGAGCAACACAC
CC479-s58 811 TATCAAAGAGAAATGGATCGGTATGAAAATTTTGGAAACAACCTGCACCTGGATAGGTTATAATATTAAGAATCAAAGAGAGCAACACAC

CC133-s139 901 ACATCAATTTATGAAATGATTGGGAAAAACACACGGTTAAATTAGTAGCTTCGCAATCTAGCGAATAA
CC151-s31 901 ACATCAATTTATGAAATGATTGGGAAAAACACACGGTTAAATTAGTAGCTTCGCAATCTAGCGAATAA
CC151-s483 901 ACATCAATTTATGAAATGATTGGGAAAAACACACGGTTAAATTAGTAGCTTCGCAATCTAGCGAATAA
CC151-s909 901 ACATCAATTTATGAAATGATTGGGAAAAACACACGGTTAAATTAGTAGCTTCGCAATCTAGCGAATAA
CC479-s15 901 ACATCAATTTATGAAATGATTGGGAAAAACACACGGTTAAATTAGTAGCTTCGCAATCTAGCGAATAA
CC479-s28 901 ACATCAATTTATGAAATGATTGGGAAAAACACACGGTTAAATTAGTAGCTTCGCAATCTAGCGAATAA
CC479-s58 901 ACATCAATTTATGAAATGATTGGGAAAAACACACGGTTAAATTAGTAGCTTCGCAATCTAGCGAATAA
    
```

**Figure S1 (b).** Alignment of *lukF'* of seven *S. aureus* isolates obtained from cases of bovine mastitis. Sequences were obtained from whole genome sequence (WGS) from seven isolates using reference *lukF* sequence (GenBank accession: 1262954)

```

CC133-s139 1 GTTTTTCAGGTATATTTCTATACAACATAAATGAACCTTTTTAATTATTTGATCGTGTGTTGAATGTTTTTTGGGTGTAACTACTATTTT
CC151-s31 1 GTTTTTCAGGTATATTTCTATACAACATAAATGAACCTTTTTAATTATTTGATCGTGTGTTGAATGTTTTTTGGGTGTAACTACTATTTT
CC151-s483 1 GTTTTTCAGGTATATTTCTATACAACATAAATGAACCTTTTTAATTATTTGATCGTGTGTTGAATGTTTTTTGGGTGTAACTACTATTTT
CC151-s909 1 GTTTTTCAGGTATATTTCTATACAACATAAATGAACCTTTTTAATTATTTGATCGTGTGTTGAATGTTTTTTGGGTGTAACTACTATTTT
CC479-s15 1 GTTTTTCAGGTATATTTCTATACAACATAAATGAACCTTTTTAATTATTTGATCGTGTGTTGAATGTTTTTTGGGTGTAACTACTATTTT
CC479-s28 1 GTTTTTCAGGTATATTTCTATACAACATAAATGAACCTTTTTAATTATTTGATCGTGTGTTGAATGTTTTTTGGGTGTAACTACTATTTT
CC479-s58 1 GTTTTTCAGGTATATTTCTATACAACATAAATGAACCTTTTTAATTATTTGATCGTGTGTTGAATGTTTTTTGGGTGTAACTACTATTTT

CC133-s139 91 AGAGATTTATTAACCTTATTGAATTTTTAATAAATTTTAATTATATAAATATGAATTATGTAATAGTATAAAATTTGTATTAATAATATA
CC151-s31 90 AGG GATTTCATTAACCTTATTGAATTTTTAATAAATTTTAATTATATAAATATGAATTATGTAATAGTATAAAATTTGTATTAATAATATA
CC151-s483 90 AGG GATTTCATTAACCTTATTGAATTTTTAATAAATTTTAATTATATAAATATGAATTATGTAATAGTATAAAATTTGTATTAATAATATA
CC151-s909 90 AGG GATTTCATTAACCTTATTGAATTTTTAATAAATTTTAATTATATAAATATGAATTATGTAATAGTATAAAATTTGTATTAATAATATA
CC479-s15 91 AGAGATTTATTAACCTTATTGAATTTTTAATAAATTTTAATTATATAAATATGAATTATGTAATAGTATAAAATTTGTATTAATAATATA
CC479-s28 91 AGAGATTTATTAACCTTATTGAATTTTTAATAAATTTTAATTATATAAATATGAATTATGTAATAGTATAAAATTTGTATTAATAATATA
CC479-s58 91 AGAGATTTATTAACCTTATTGAATTTTTAATAAATTTTAATTATATAAATATGAATTATGTAATAGTATAAAATTTGTATTAATAATATA

CC133-s139 181 AAGAGAAAGAAAGTGAACCT
CC151-s31 180 AAGAGAAAGAAAGTGAACCT
CC151-s483 180 AAGAGAAAGAAAGTGAACCT
CC151-s909 180 AAGAGAAAGAAAGTGAACCT
CC479-s15 181 AAGAGAAAGAAAGTGAACCT
CC479-s28 181 AAGAGAAAGAAAGTGAACCT
CC479-s58 181 AAGAGAAAGAAAGTGAACCT
    
```

**Figure S1 (c).** Alignment of the putative promoter region (the region of 200 base pairs before the start of *lukM*, containing the

putative Tata box and promoter elements) of *lukM-lukF'* operon of seven *S. aureus* isolates obtained from cases of bovine mastitis

```

CC133-s139-WGS 1 ATGCATAAGTTAGCACATAC
CC151-s31-WGS 1 ATGCATAAGTTAGCACATAC
CC151-s483-WGS 1 ATGCATAAGTTAGCACATAC
CC151-s505-PCR 1 ATGCATAAGTTAGCACATAC
CC151-s605-PCR 1 ATGCATAAGTTAGCACATAC
CC151-s909-WGS 1 ATGCATAAGTTAGCACATAC
CC479-s15-WGS 1 AAGCATAAGTTAGCACATAC
CC479-s28-WGS 1 AAGCATAAGTTAGCACATAC
CC479-s58-WGS 1 AAGCATAAGTTAGCACATAC
CC479-s192-PCR 1 AAGCATAAGTTAGCACATAC
CC479-s245-PCR 1 AAGCATAAGTTAGCACATAC
CC479-s670-PCR 1 AAGCATAAGTTAGCACATAC
    
```

**Figure S1 (d).** Alignment of the first 20 nucleotides of rot in 12 *S. aureus* isolates obtained from cases of bovine mastitis. Sequences of seven isolates obtained from the genome after whole genome sequencing (labeled WGS), five additional sequences were obtained from sequenced PCR products (labeled PCR).

**Table S1.** Number of *S. aureus* of different lineages found among bovine isolates, with percentage of *lukM-lukF'* positive *S. aureus* among these lineages

| Lineage                  | Sample   | Portugal       | Sweden <sup>1</sup>  | Germany <sup>4</sup> | Japan                | Switzerland/Germany | South Africa         |
|--------------------------|----------|----------------|----------------------|----------------------|----------------------|---------------------|----------------------|
|                          |          | Nasal swabs    | Clinical mastitis    | Subclinical mastitis | Subclinical mastitis | Mastitis            | Subclinical mastitis |
| ST133-CC133              |          |                | 20(100) <sup>2</sup> | 21(100)              |                      | 6 (100)             |                      |
| ST124-CC133              | 13 (0)   |                |                      |                      |                      |                     |                      |
| ST352-CC97 <sup>3</sup>  | 13 (100) |                |                      |                      | 24 (92)              |                     | 71 (100)             |
| ST97-CC97 <sup>4</sup>   |          |                | 13 (85)              | 9 (0)                | 16 (6)               | 23 (0)              | 63 (0)               |
| ST151-CC151              |          |                |                      | 98 (100)             |                      | 61 (100)            |                      |
| ST705-CC705 <sup>5</sup> |          |                | 29 (100)             |                      | 9 (100)              |                     | 10 (100)             |
| ST479-CC479              |          |                | 1(100)               | 33 (97)              |                      |                     |                      |
| ST30-CC20 <sup>6</sup>   |          |                | 1 (0)                |                      | 14 (0)               | 9 (11)              |                      |
| ST5 -CC5                 |          |                |                      |                      | 4 (0)                | 2 (0)               |                      |
| ST7-CC7 <sup>7</sup>     | 8 (0)    |                |                      | 1 (0)                | 1 (0)                |                     |                      |
| ST398-CC398              |          |                |                      | 8(0)                 |                      | 2(0)                |                      |
| ST8-CC8                  |          |                | 1 (0)                |                      | 6 (0)                | 11 (0)              | 1 (0)                |
| ST508-CC45               |          |                | 3 (0)                | 5 (0)                | 3 (0)                |                     | 1 (100)              |
| Other CC                 |          |                | 2 (0)                | 14 (0)               | 33 (0)               | 14 (0)              |                      |
| <b>Total</b>             |          | <b>34 (38)</b> | <b>70 (90)</b>       | <b>189 (80)</b>      | <b>110 (29)</b>      | <b>128 (53)</b>     | <b>146 (56)</b>      |
| <b>References</b>        |          | [34]           | [32]                 | [16]                 | [31]                 | [33]                | [30]                 |

1. Only Clonal Complex (CC) data available in these studies
2. Number of *S. aureus* of this lineage found, with percentage of *lukM-lukF'* positive *S. aureus* among this lineage in brackets
3. Includes single locus variant (SLV) ST1366
4. Includes SLV ST124, ST1367
5. Includes SLV ST351, ST1363, ST1363, ST1365
6. Includes SLV ST1368, ST1370
7. Includes SLV ST789
